Correction

## Correction for: ciRs-6 upregulates March1 to suppress bladder cancer growth by sponging miR-653

Yinjie Su<sup>1,\*</sup>, Weilian Feng<sup>2,\*</sup>, Guanglei Zhong<sup>3</sup>, Yiyao Ya<sup>1,4</sup>, Zehu Du<sup>5</sup>, Juanyi Shi<sup>1</sup>, Luping Chen<sup>6</sup>, Wen Dong<sup>1</sup>, Tianxin Lin<sup>1</sup>

<sup>1</sup>The Department of Urology, Sun Yat-Sen Memorial Hospital, Sun Yat-Sen University, Guangzhou, China

<sup>2</sup>The Department of Endocrinology, Sun Yat-Sen Memorial Hospital, Sun Yat-Sen University, Guangzhou, China

<sup>3</sup>The Department of Gynecological oncology, Sun Yat-Sen Memorial Hospital, Sun Yat-Sen University, Guangzhou, China

<sup>4</sup>The Department of Urology, Guangzhou First People's Hospital, School of Medicine, South China University of Technology, Guangzhou, China

<sup>5</sup>The Department of Thyroid Surgery, Sun Yat-Sen Memorial Hospital, Sun Yat-Sen University, Guangzhou, China

<sup>6</sup>The Department of Pediatric Surgery, Sun Yat-Sen Memorial Hospital, Sun Yat-Sen University, Guangzhou, China

\*Equal contribution

**Correspondence to:** Tianxin Lin, Wen Dong; **email:** [lintx@mail.sysu.edu.cn](mailto:lintx@mail.sysu.edu.cn), [dongwen@mail.sysu.edu.cn](mailto:dongwen@mail.sysu.edu.cn)

**Original article:** [Aging \(Albany NY\) 2019; 11: 11202 – 11223](#)

PMID: 31819015

PMCID: PMC6932879

doi: [10.18632/aging.102525](https://doi.org/10.18632/aging.102525)

**This article has been corrected:** The authors requested the replacement of Figure 4E and Table 1. Figure 4E (ciRs-6+miR-nc) was quite similar to Supplementary Figure 1D (si-3 in T24 cells) and was slightly updated. Changes of Table 1 are done to correct the statistical mistakes.

These corrections do not change the content of the publication and do not affect the conclusion of this research. The authors apologize for the unintentional mistakes.

The corrected Figure and Table are provided below.

**E**

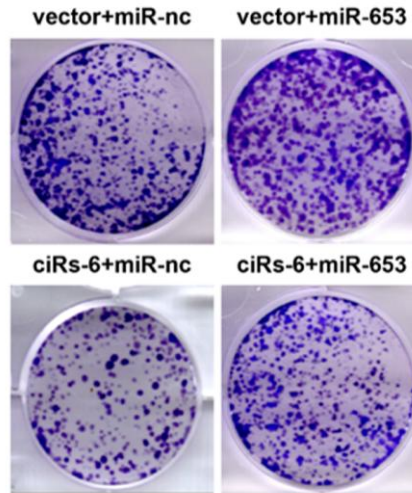

**Figure 4. miR-653 rescues the tumor suppressive effect of ciRs-6 in bladder cancer.** (E) Clone formation assays were used to evaluate clone forming ability.

**Table 1. Relationship between ciRs-6 level and clinical characteristics in bladder cancer.**

| Total                          | Patients | Expression of ciRs-6 |        |        |
|--------------------------------|----------|----------------------|--------|--------|
|                                |          | High                 | Low    | p      |
| Age(mean)                      | 50       | 47.931               | 52.069 | 0.395  |
| <b>Gender</b>                  |          |                      |        |        |
| Male                           | 45       | 22                   | 23     | 0.753  |
| Female                         | 13       | 7                    | 6      |        |
| <b>Tumor stage</b>             |          |                      |        |        |
| Tis/Ta/T1                      | 31       | 22                   | 9      | <0.001 |
| T2                             | 17       | 7                    | 10     |        |
| T3/T4                          | 10       | 0                    | 10     |        |
| <b>Grade</b>                   |          |                      |        |        |
| High                           | 20       | 5                    | 15     | 0.006  |
| Low                            | 38       | 24                   | 14     |        |
| <b>Number of tumors</b>        |          |                      |        |        |
| Solitary                       | 41       | 23                   | 18     | 0.149  |
| Multiple                       | 17       | 6                    | 11     |        |
| <b>Lymph node metastasis</b>   |          |                      |        |        |
| Negative                       | 23       | 13                   | 10     | 0.421  |
| Positive                       | 35       | 16                   | 19     |        |
| <b>Follow-up (month, mean)</b> | 33.23    | 33.00                | 33.45  | 0.047  |
